# Supplementary material for: Chemical and electronic structures of cobalt oxynitride films deposited by NH3vs. N2 plasma: theory vs. experiment
Source: Royal Society of Chemistry journal article supplement (doi:10.1039/d0cp04168h), 2020-01-01
Supplement: d0cp04168h1.pdf [file d0cp04168h1.pdf]

**Supplemental Information for:**  
**Chemical and Electronic Structures of Cobalt Oxynitride Films Deposited by  $\text{NH}_3$  vs.  $\text{N}_2$  Plasma: Theory vs. Experiment**

Adaeze Osonkie, Veronica Lee, Adeola Oyelade, Maximillian Mrozek-McCourt, Precious Chukwunye, Teresa D. Golden, Thomas R. Cundari, and Jeffry A. Kelber

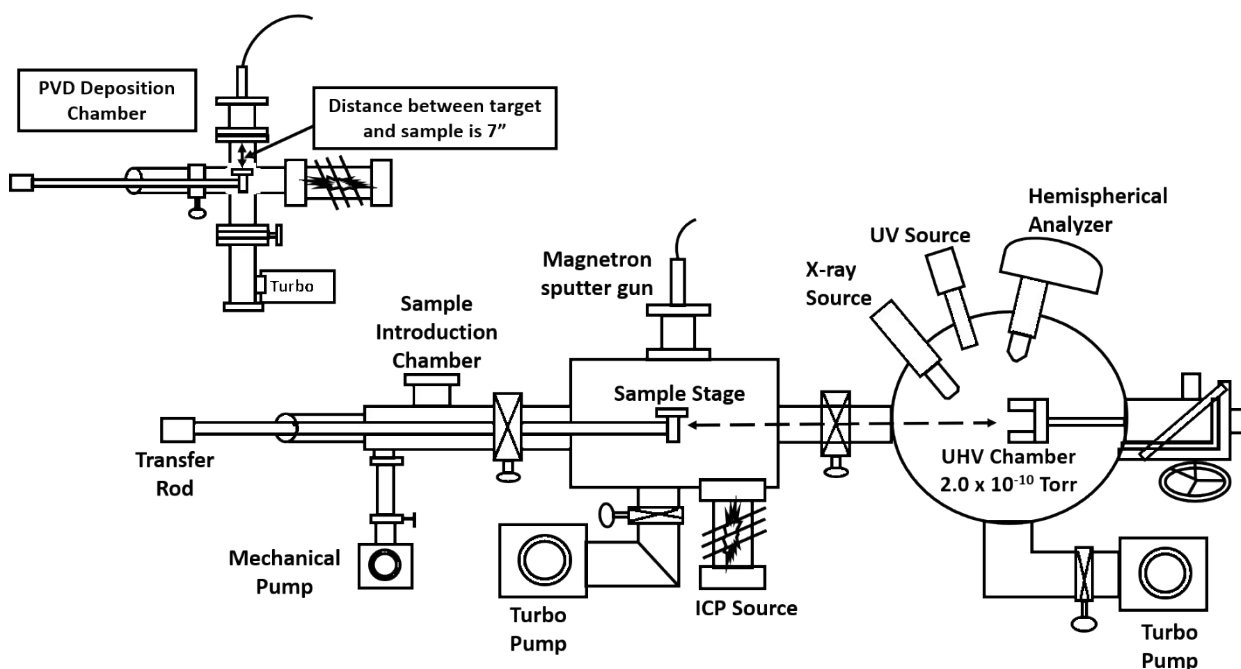

**Fig. S1** Schematic of Chamber 1: UHV chamber for magnetron sputtering and XPS analysis

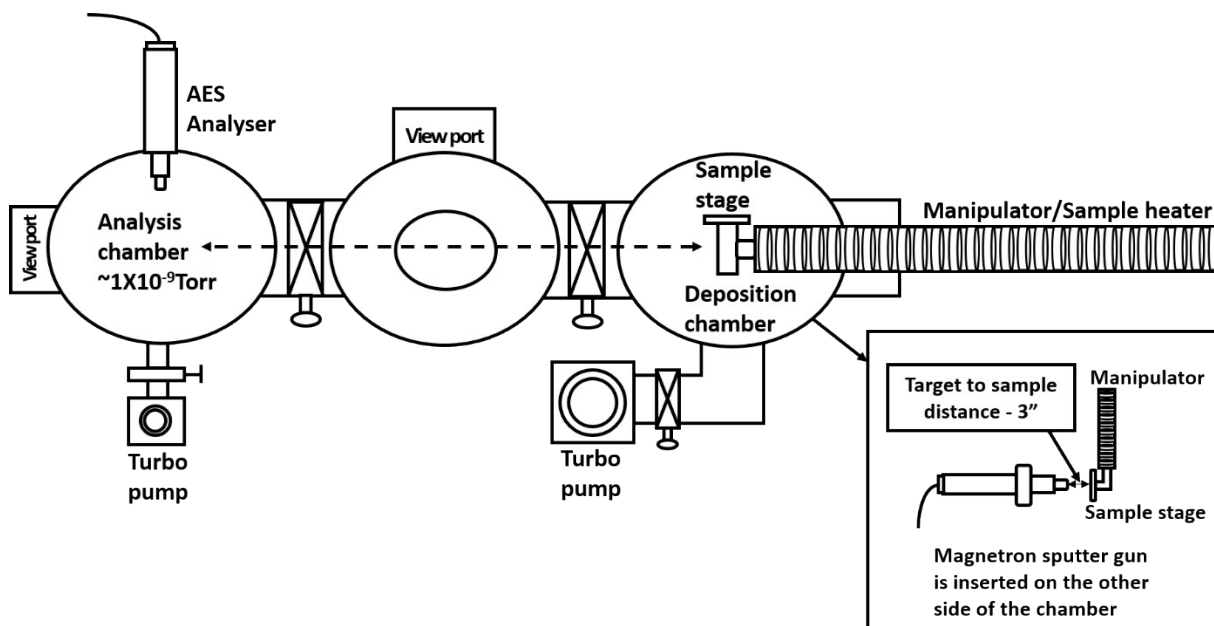

**Fig. S2** Schematic of Chamber 2: UHV chamber for magnetron sputtering and AES analysis

**TABLE S1 CoO<sub>1-x</sub>N<sub>x</sub> Films prepared**

| <b>Film preparation method</b>            | <b>Chamber</b> | <b>Composition<sup>1</sup></b>                                                 | <b>Estimated Film thickness (Å)</b> | <b>XRD results</b>                                                                | <b>Film No.</b> |
|-------------------------------------------|----------------|--------------------------------------------------------------------------------|-------------------------------------|-----------------------------------------------------------------------------------|-----------------|
| Ar:N <sub>2</sub> sputter dep on Si(100)  | Chamber 2      | CoO <sub>0.4</sub> N <sub>0.6</sub><br>(CoO <sub>0.2</sub> N <sub>0.8</sub> )  | 600                                 | Preferred 220 orientation on Si(100)                                              | 1               |
| NH <sub>3</sub> sputter dep on Si(100)    | Chamber 1      | CoO <sub>0.2</sub> N <sub>0.8</sub><br>(~CoO <sub>0.1</sub> N <sub>0.9</sub> ) | 150                                 | Only Si diffraction peaks observed                                                | 2               |
| Ar:N <sub>2</sub> sputter dep on MgO(100) | Chamber 2      | NA                                                                             | 600                                 | Only MgO diffraction peaks observed                                               | 3               |
| NH <sub>3</sub> nitridation of Co/Si(100) | Chamber 1      | CoO <sub>0.2</sub> N <sub>0.8</sub><br>(CoO <sub>0.1</sub> N <sub>0.9</sub> )  | 200                                 | Preferred (220) orientation (Weak diffraction peaks possibly due to thinner film) | 4               |
| N <sub>2</sub> sputter dep on Si(100)     | Chamber 1      | CoO <sub>0.4</sub> N <sub>0.6</sub><br>(CoO <sub>0.2</sub> N <sub>0.8</sub> )  | 300                                 | Only Si diffraction peaks observed                                                | 5               |

<sup>1</sup>Compositions in parenthesis indicate corrections for surface oxide/hydroxide layers due to either take-off angle resolved measurements or Ar ion sputtering to remove such layers.

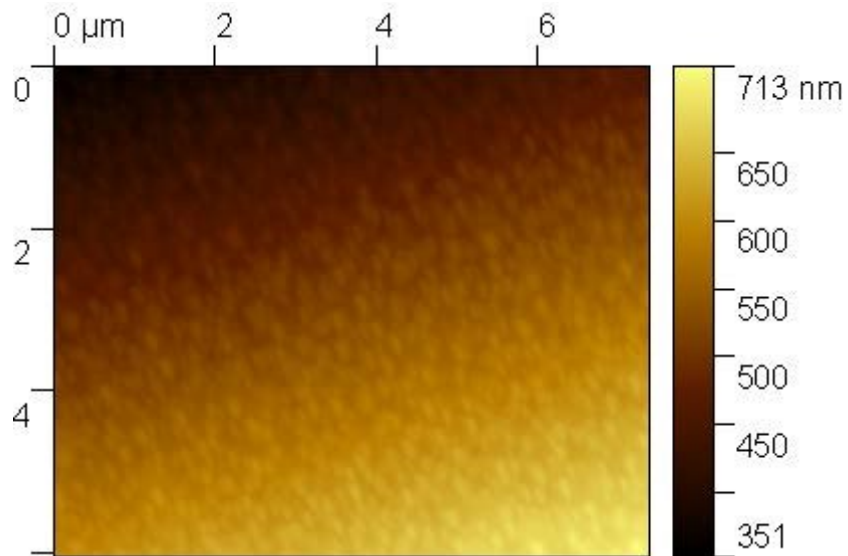

**Figure S3.** AFM data of cobalt oxynitride film formed by  $\text{NH}_3$  plasma nitridation of the metallic film. The rms roughness is 1.9 nm.

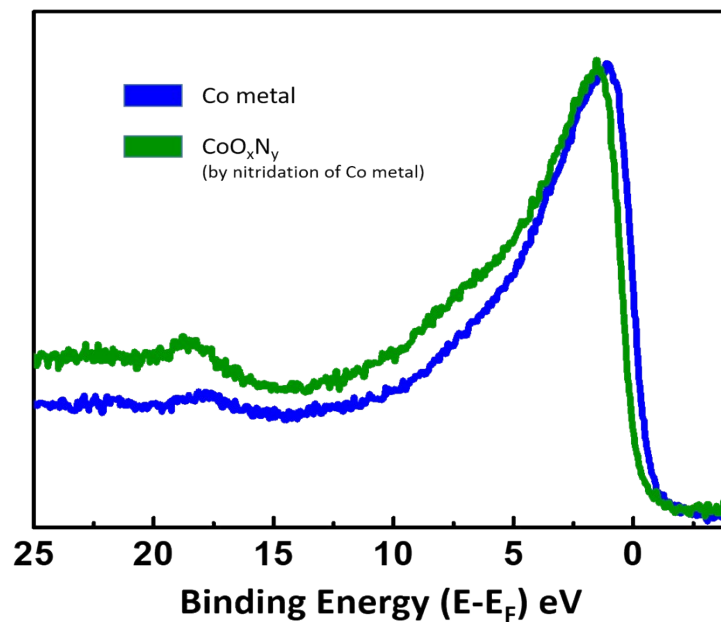

**Figure S4.** Detailed comparison of valence band spectra of Co metal (blue trace) and a cobalt oxynitride film formed by  $\text{NH}_3$  plasma nitridation of the metallic film. (The spectra are the same as in Figs. 3a and 3b.)
